# Supplementary material
Source: PubMed Central journal article supplement (PMC6468255)

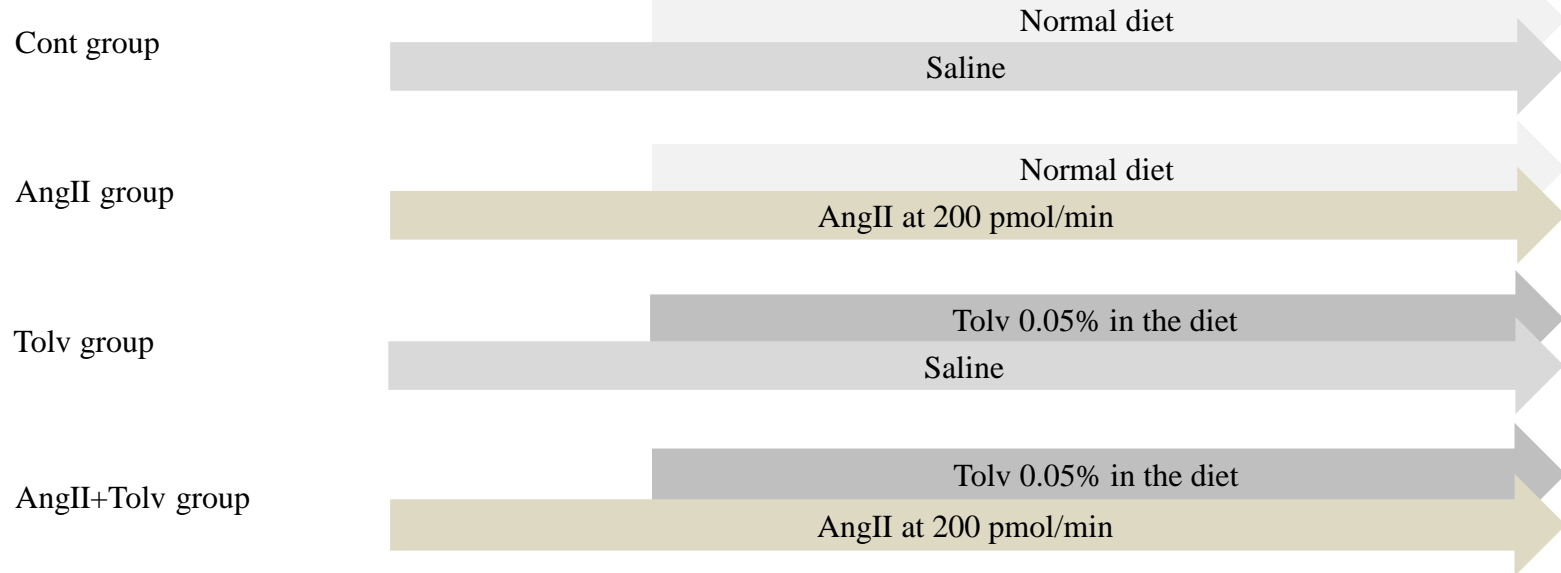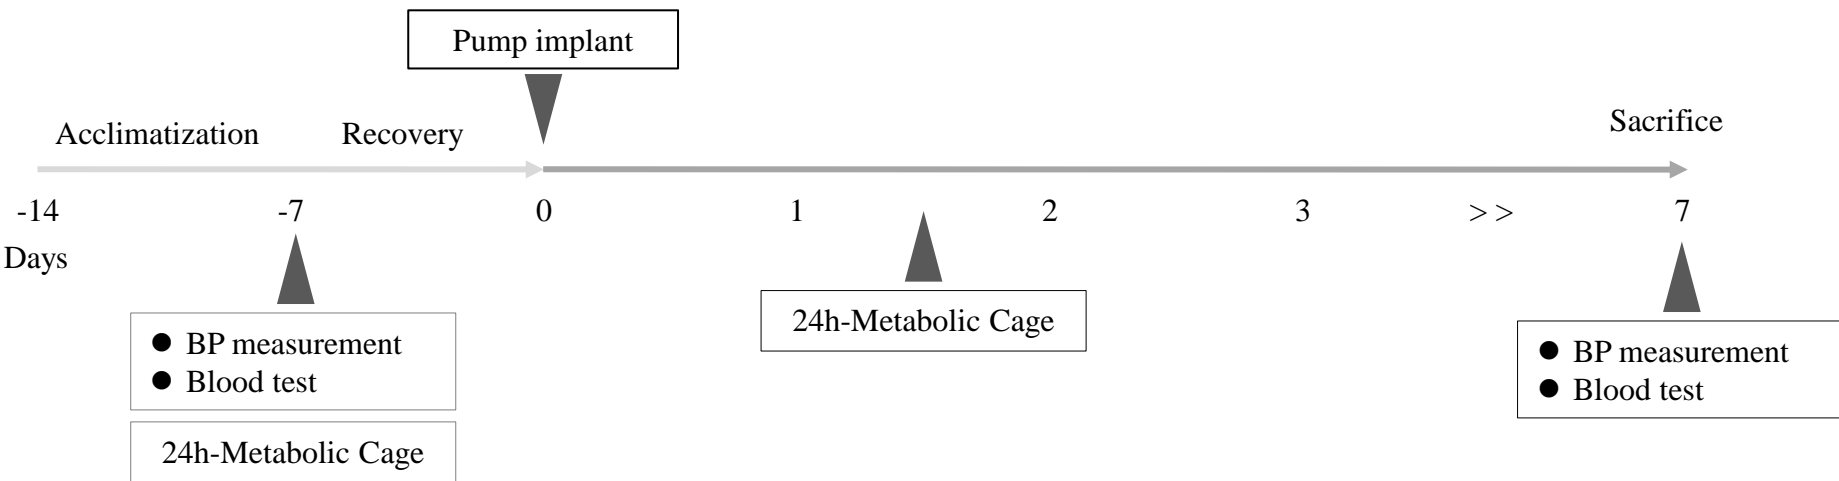

Supplement: BPH-176-1315-s001.pdf [file BPH-176-1315-s001.pdf]

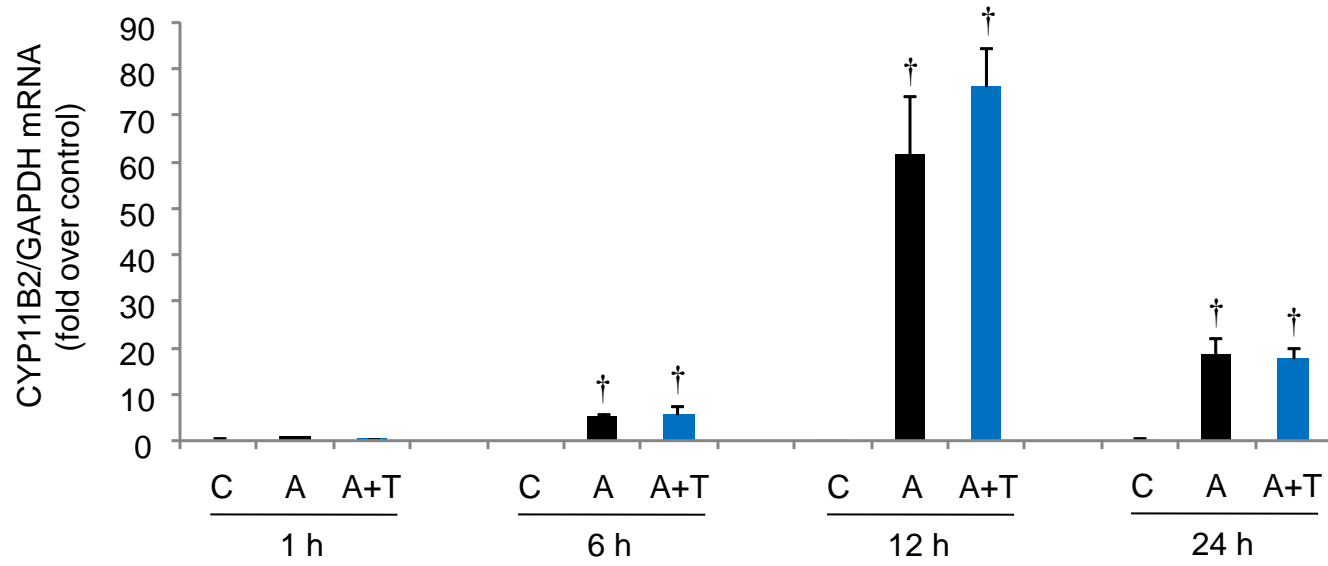

Supplement: BPH-176-1315-s002.pdf [file BPH-176-1315-s002.pdf]

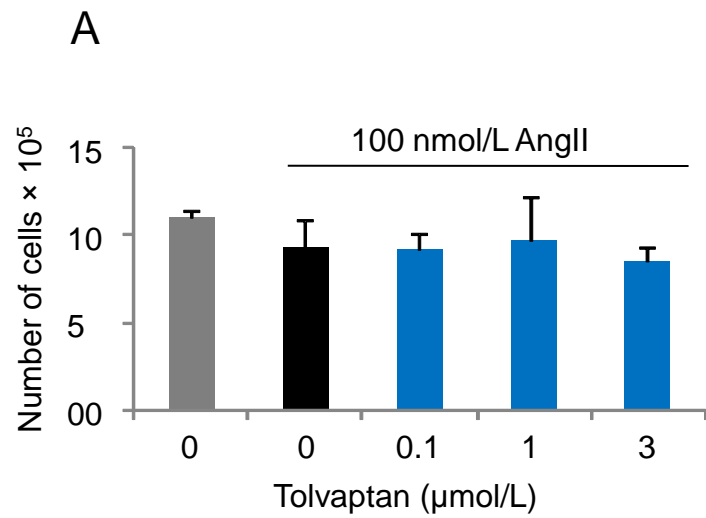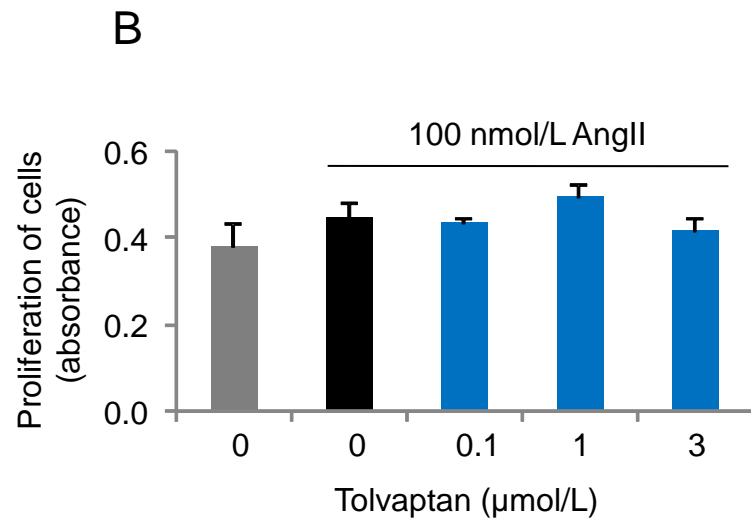

Supplement: BPH-176-1315-s003.pdf [file BPH-176-1315-s003.pdf]

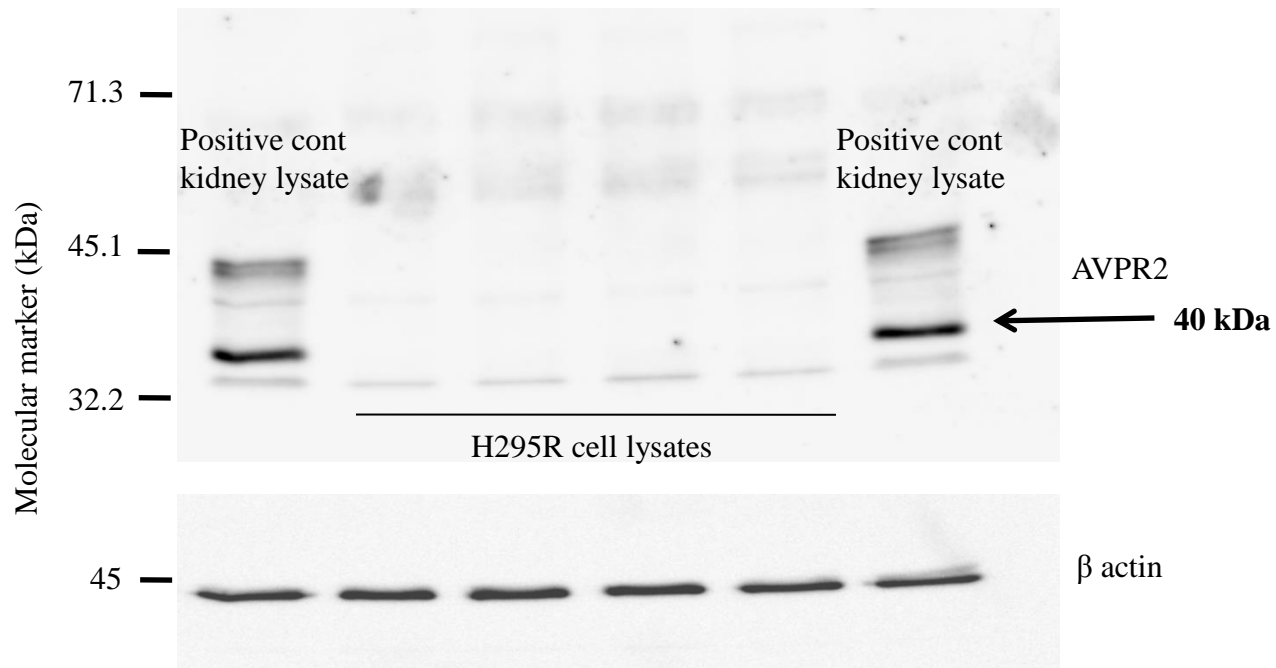

Supplement: BPH-176-1315-s004.pdf [file BPH-176-1315-s004.pdf]

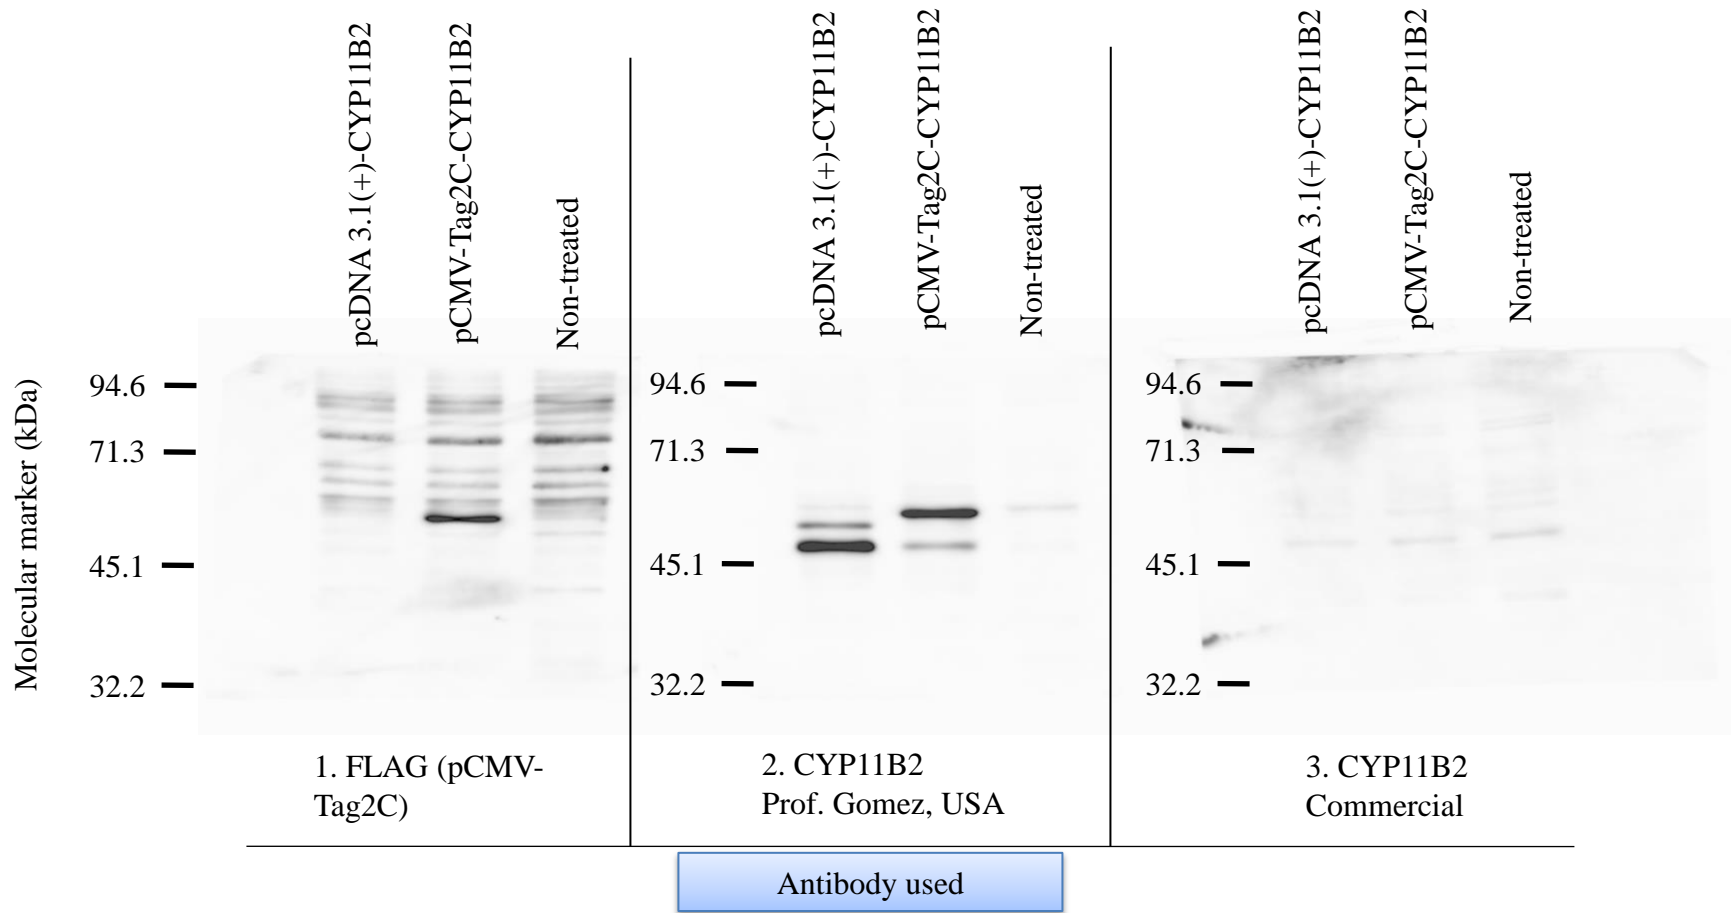

Supplement: BPH-176-1315-s005.pdf [file BPH-176-1315-s005.pdf]
